# Supplementary material for: Early-Stage Venture Incubation and Mentoring Promote Learning, Scaling, and Profitability Among Disadvantaged Entrepreneurs
Source: Atypon-hosted journal article supplement (doi:10.1287/orsc.2020.1367), 2020-10-22
Supplement: orsc.2020.1367.sm1.pdf [file orsc.2020.1367.sm1.pdf]

## ONLINE APPENDIX

**Figure A1. Comparison of Pre-Treatment Covariates within Selected Applicants between Joined and Not Joined– Check for Ashenfelter’s Dip**

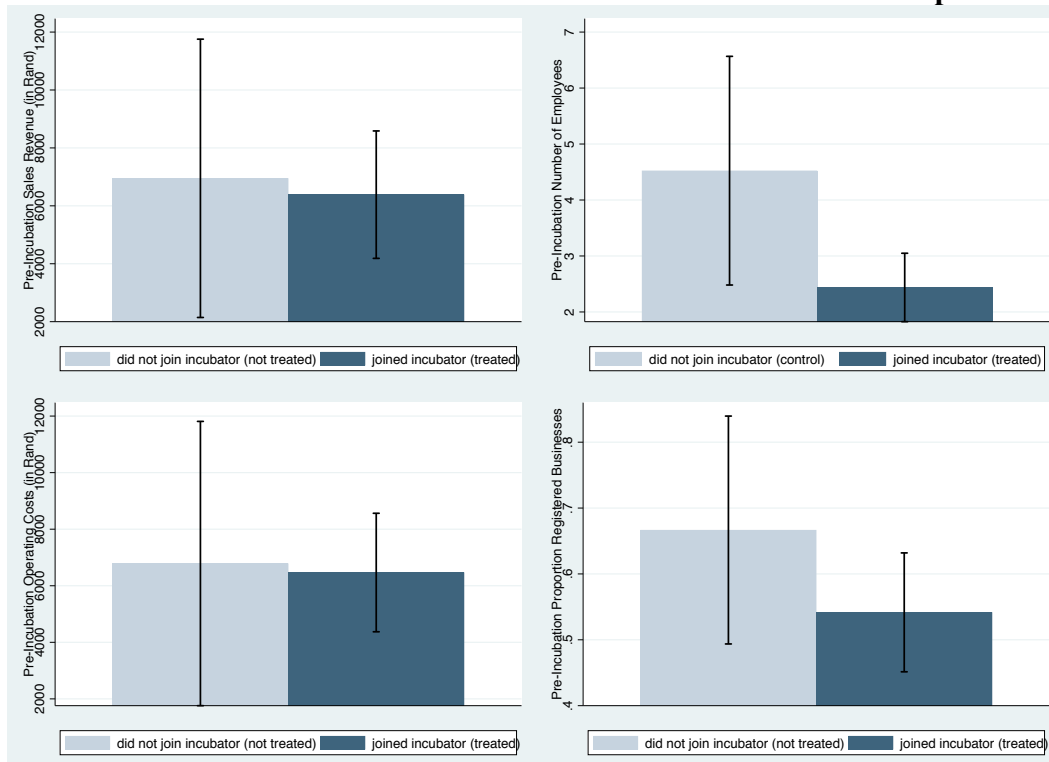

*Note* differences in pre-treatment performance among selected applicants who joined the incubator, compared to selected applicants who did not join the incubator, with 95% CI.

**Figure A2. Distance to Incubator and Probability of Joining if Selected (Logit Model)**

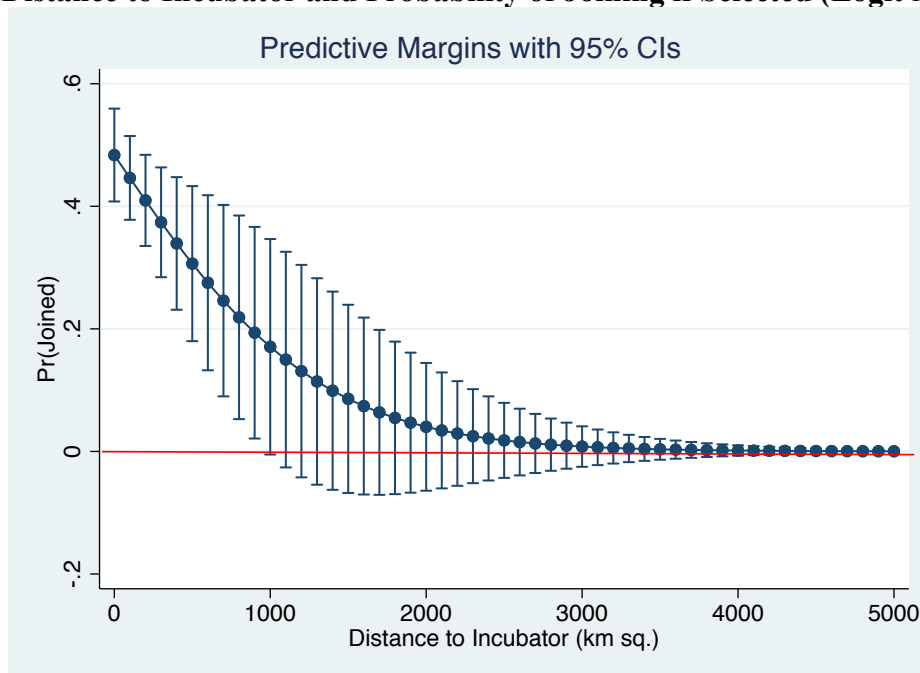

**Figure A3. Composition of Selected Applicants that Joined the Incubator****A. ETHNICITY**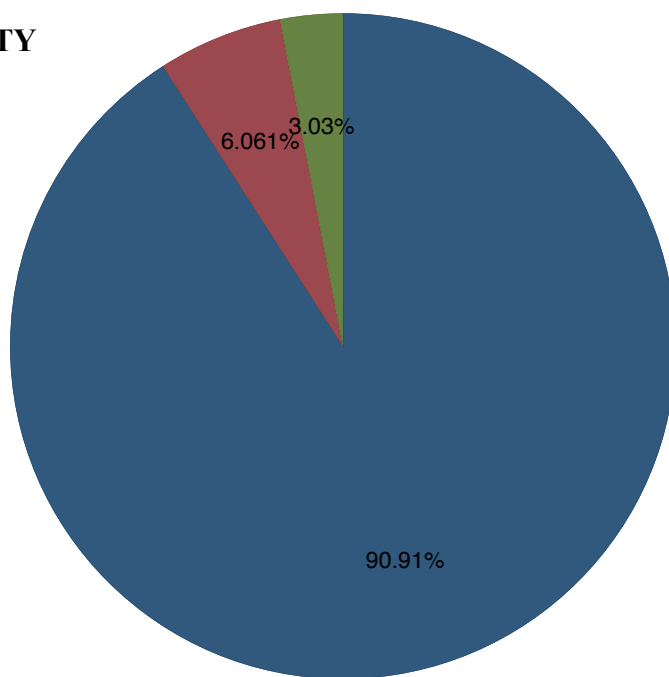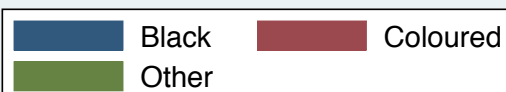**B. AGE**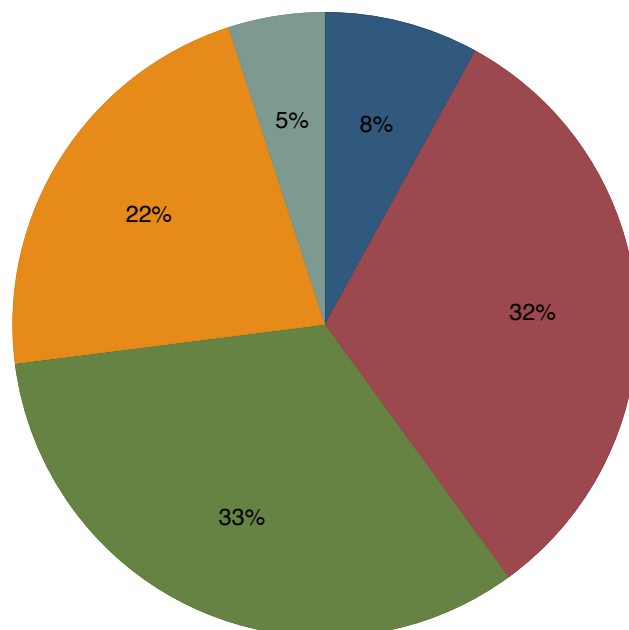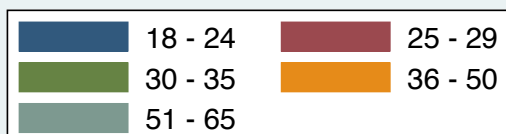

**C. INDUSTRY**

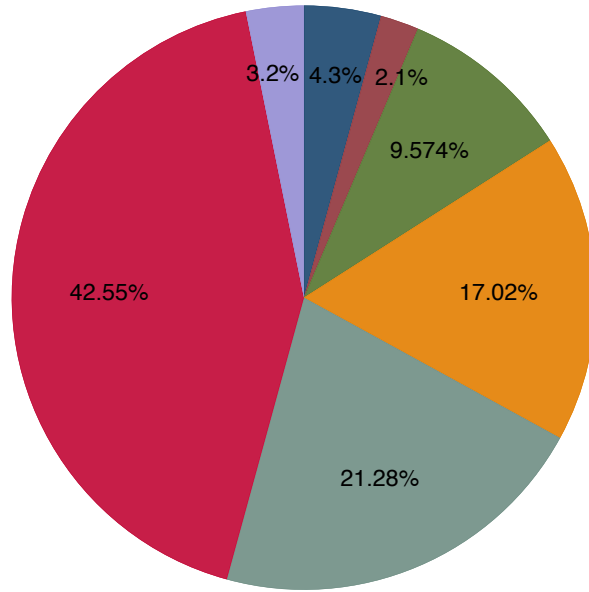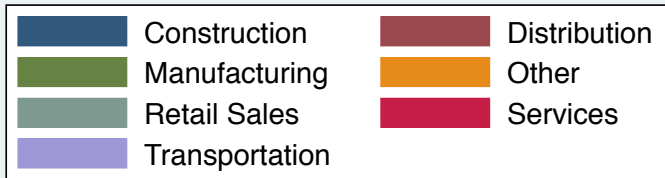

**D. MOTHER TONGUE**

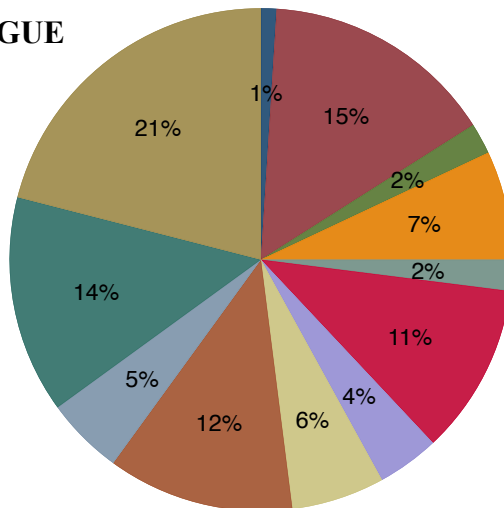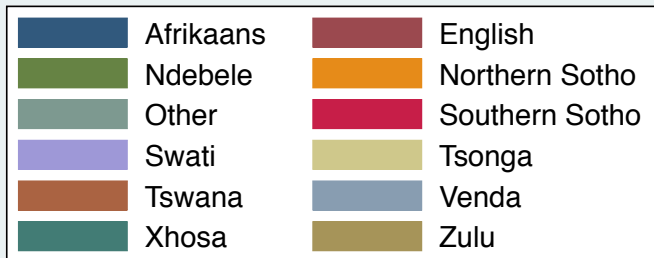

**Table A1. Summary Statistics**

Sample for Study 1: Applicants Selected into the Incubator

| Variable                                         | Mean   | S.D.   | (1)   | (2)   | (3)   | (4)   | (5)   | (6)   | (7)   |
|--------------------------------------------------|--------|--------|-------|-------|-------|-------|-------|-------|-------|
| (1) Sales Revenue T0 (monthly, in Rand)          | 9,378  | 11,480 |       |       |       |       |       |       |       |
| (2) Sales Revenue T1 (monthly, in Rand)          | 14,013 | 15,976 | 0.73  |       |       |       |       |       |       |
| (3) Costs T0 (monthly, in Rand)                  | 10,027 | 12,883 | 0.89  | 0.73  |       |       |       |       |       |
| (4) Costs T1 (monthly, in Rand)                  | 9,824  | 12,927 | 0.66  | 0.88  | 0.71  |       |       |       |       |
| (5) Employees T0 (headcount)                     | 5.946  | 2.847  | 0.55  | 0.32  | 0.49  | 0.2   |       |       |       |
| (6) Employees T1 (headcount)                     | 6.892  | 7.849  | 0.19  | 0.17  | 0.21  | 0.15  | 0.54  |       |       |
| (7) Registered Status T1                         | 0.973  | 0.164  | 0.11  | 0.13  | 0.11  | 0.1   | 0.06  | 0.15  |       |
| (8) Profit T0 (monthly, in Rand)                 | -649   | 5,776  | -0.01 | -0.17 | -0.45 | -0.27 | -0.01 | -0.09 | -0.02 |
| (9) Profit T1 (monthly, in Rand)                 | 4,189  | 7,801  | 0.41  | 0.6   | 0.32  | 0.14  | 0.32  | 0.09  | 0.09  |
| (10) Log(1+ Sales T1/Sales T0)                   | 0.902  | 0.434  | -0.13 | 0.52  | -0.06 | 0.34  | -0.1  | 0.07  | 0.08  |
| (11) Log(1+ Costs T1/Costs T0)                   | 0.707  | 0.231  | 0.03  | 0.18  | 0.06  | 0.17  | 0.15  | 0.83  | 0.52  |
| (12) Log(1+ Employment T1/Employment T0)         | 0.732  | 0.447  | -0.14 | 0.36  | -0.21 | 0.4   | -0.13 | 0.03  | 0.01  |
| (13) Log(1+ Registered T1/Registered T0)         | 0.674  | 0.114  | 0.11  | 0.13  | 0.11  | 0.1   | 0.06  | 0.15  | 1     |
| (14) Female                                      | 0.568  | 0.502  | -0.32 | -0.36 | -0.12 | -0.22 | -0.29 | -0.32 | -0.15 |
| (15) Age                                         | 31.81  | 6.48   | 0.23  | 0.19  | 0.19  | 0.27  | -0.01 | -0.04 | 0.05  |
| (16) Distance to Incubator (in km <sup>2</sup> ) | 761    | 2292   | 0     | 0.25  | 0.12  | 0.26  | -0.09 | -0.07 | 0.06  |

  

| Variable                                         | Mean  | S.D.  | (8)   | (9)   | (10)  | (11)  | (12)  | (13)  | (14)  | (15) |
|--------------------------------------------------|-------|-------|-------|-------|-------|-------|-------|-------|-------|------|
| (8) Profit T0 (monthly, in Rand)                 | -649  | 5,776 |       |       |       |       |       |       |       |      |
| (9) Profit T1 (monthly, in Rand)                 | 4,189 | 7,801 | 0.09  |       |       |       |       |       |       |      |
| (10) Log(1+ Sales T1/Sales T0)                   | 0.902 | 0.434 | -0.13 | 0.49  |       |       |       |       |       |      |
| (11) Log(1+ Costs T1/Costs T0)                   | 0.707 | 0.231 | -0.07 | 0.09  | 0.27  |       |       |       |       |      |
| (12) Log(1+ Employment T1/Employment T0)         | 0.732 | 0.447 | 0.19  | 0.07  | 0.66  | 0.24  |       |       |       |      |
| (13) Log(1+ Registered T1/Registered T0)         | 0.674 | 0.114 | -0.02 | 0.09  | 0.08  | 0.52  | 0.01  |       |       |      |
| (14) Female                                      | 0.568 | 0.502 | -0.37 | -0.36 | -0.12 | -0.31 | -0.18 | -0.15 |       |      |
| (15) Age                                         | 31.81 | 6.48  | 0.04  | -0.05 | 0.01  | -0.02 | 0.06  | 0.05  | -0.16 |      |
| (16) Distance to Incubator (in km <sup>2</sup> ) | 761   | 2292  | -0.27 | 0.08  | 0.14  | -0.02 | 0.14  | 0.06  | 0.06  | 0.01 |

Note: Log denotes the natural logarithm. T0 denotes the time of applying, T1 denotes 6-months after applying to the incubator.

## Sample for Study 2: Participants in the Incubator

| Variable                                | Mean   | S.D.   | (1)   | (2)  | (3)   | (4)   | (5)   | (6)   | (7)   |
|-----------------------------------------|--------|--------|-------|------|-------|-------|-------|-------|-------|
| (1) Baseline Exam Score (0-100)         | 6.64   | 4.31   |       |      |       |       |       |       |       |
| (2) Final Exam Score (0-100)            | 43.92  | 11.65  | 0.36  |      |       |       |       |       |       |
| (3) Percent of Sessions Attended        | 19.86  | 29.43  | 0.03  | 0.29 |       |       |       |       |       |
| (4) Age                                 | 33.51  | 8.53   | 0.05  | 0.01 | 0.05  |       |       |       |       |
| (5) Gender (Female)                     | 0.413  | 0.493  | 0.21  | 0.12 | 0.08  | 0.28  |       |       |       |
| (6) Nationality (Foreign-born)          | 0.056  | 0.23   | 0.13  | 0.23 | 0.11  | 0.06  | 0.15  |       |       |
| (7) Dropout                             | 0.008  | 0.089  | 0.22  | 0.29 | 0.2   | -0.01 | 0.11  | 0.37  |       |
| (8) Profits (in Rand)                   | 3,436  | 8,046  | 0     | 0.13 | 0.14  | 0.21  | -0.09 | -0.08 | -0.03 |
| (9) Revenue (in Rand)                   | 7,202  | 16,518 | 0.09  | 0.12 | 0.17  | 0.25  | -0.05 | -0.06 | 0.05  |
| (10) Costs (in Rand)                    | 3,766  | 10,179 | 0.14  | 0.1  | 0.16  | 0.23  | -0.01 | -0.04 | 0.1   |
| (11) Profits (in Rand, Log)             | 4.128  | 4.088  | 0     | 0.24 | 0.38  | 0.19  | -0.05 | -0.07 | -0.01 |
| (12) Revenue (in Rand, Log)             | 4.588  | 4.403  | 0.05  | 0.28 | 0.43  | 0.18  | -0.03 | -0.04 | 0.1   |
| (13) Costs (in Rand, Log)               | 3.577  | 4.031  | 0.07  | 0.24 | 0.39  | 0.17  | 0     | -0.09 | 0.13  |
| (14) Peer effects on learning (Log)     | 3.607  | 0.072  | -0.1  | 0.11 | 0.11  | -0.11 | -0.07 | 0.03  | 0.1   |
| (15) Peer effects on revenue (Log)      | 10.585 | 0.799  | 0.04  | 0.05 | -0.07 | 0.01  | -0.08 | -0.08 | -0.09 |
| (16) Peer effects on profits (Log)      | 9.593  | 0.685  | 0.02  | 0.07 | -0.06 | 0.03  | 0     | -0.09 | -0.03 |
| (17) Lagged Mentor Ability              | 3.607  | 0.175  | 0.07  | 0.59 | 0.21  | -0.02 | 0.1   | 0.13  | 0.09  |
| (18) Score Difference (exit - baseline) | 37.278 | 10.857 | -0.01 | 0.93 | 0.3   | -0.01 | 0.04  | 0.2   | 0.22  |
| (19) Score Difference (Log)             | 3.595  | 0.338  | 0.04  | 0.94 | 0.28  | -0.03 | 0.06  | 0.18  | 0.15  |

  

| Variable                                | Mean   | S.D.   | (8)  | (9)   | (10)  | (11) | (12) | (13) | (14)  | (15) | (16) | (17) | (18) |
|-----------------------------------------|--------|--------|------|-------|-------|------|------|------|-------|------|------|------|------|
| (9) Revenue (in Rand)                   | 7,202  | 16,518 | 0.88 |       |       |      |      |      |       |      |      |      |      |
| (10) Costs (in Rand)                    | 3,766  | 10,179 | 0.64 | 0.93  |       |      |      |      |       |      |      |      |      |
| (11) Profits (in Rand, Log)             | 4.128  | 4.088  | 0.57 | 0.54  | 0.43  |      |      |      |       |      |      |      |      |
| (12) Revenue (in Rand, Log)             | 4.588  | 4.403  | 0.54 | 0.57  | 0.5   | 0.97 |      |      |       |      |      |      |      |
| (13) Costs (in Rand, Log)               | 3.577  | 4.031  | 0.54 | 0.63  | 0.59  | 0.83 | 0.9  |      |       |      |      |      |      |
| (14) Peer effects on learning (Log)     | 3.607  | 0.072  | 0.05 | 0.07  | 0.06  | 0.07 | 0.09 | 0.08 |       |      |      |      |      |
| (15) Peer effects on revenue (Log)      | 10.585 | 0.799  | 0.17 | 0.18  | 0.16  | 0.1  | 0.08 | 0.08 | -0.12 |      |      |      |      |
| (16) Peer effects on profits (Log)      | 9.593  | 0.685  | 0.29 | 0.26  | 0.19  | 0.11 | 0.08 | 0.09 | 0.05  | 0.69 |      |      |      |
| (17) Lagged Mentor Ability              | 3.607  | 0.175  | 0.07 | -0.01 | -0.07 | 0.17 | 0.17 | 0.12 | 0.29  | 0.04 | 0.08 |      |      |
| (18) Score Difference (exit - baseline) | 37.278 | 10.857 | 0.13 | 0.1   | 0.05  | 0.25 | 0.28 | 0.23 | 0.15  | 0.04 | 0.06 | 0.61 |      |
| (19) Score Difference (Log)             | 3.595  | 0.338  | 0.13 | 0.09  | 0.04  | 0.25 | 0.28 | 0.22 | 0.12  | 0.05 | 0.08 | 0.61 | 0.99 |

Note: Log denotes the natural logarithm.

**Table A2. Logit Models: Probability of Joining the Incubator if Selected, as a function of the Commuting Distance to the Incubator (kilometers from home address)**

|                                   | (1)                                                             | (2)                                                             | (3)                                                             |
|-----------------------------------|-----------------------------------------------------------------|-----------------------------------------------------------------|-----------------------------------------------------------------|
|                                   | <i>Probability of<br/>Joining the<br/>Incubator if Selected</i> | <i>Probability of<br/>Joining the<br/>Incubator if Selected</i> | <i>Probability of<br/>Joining the<br/>Incubator if Selected</i> |
| Distance to Incubator<br>(km)     | -0.00137*<br>(0.000810)                                         | -0.00146*<br>(0.000846)                                         | -0.00146*<br>(0.000880)                                         |
| Intercept                         | 1.502***<br>(0.268)                                             | 1.782<br>(1.172)                                                | 1.319<br>(1.370)                                                |
| Controls for<br>Applicant Gender  | No                                                              | Yes                                                             | Yes                                                             |
| Applicant Age                     | No                                                              | Yes                                                             | Yes                                                             |
| Applicant Ethnicity               | No                                                              | No                                                              | Yes                                                             |
| <i>Log pseudo-<br/>likelihood</i> | -55.78                                                          | -55.65                                                          | -45.87                                                          |
| <i>Pseudo R-sq.</i>               | 0.0190                                                          | 0.0212                                                          | 0.0442                                                          |
| <i>N</i>                          | 112                                                             | 112                                                             | 80                                                              |

Standard errors in parentheses

\*  $p < 0.10$ , \*\*  $p < 0.05$ , \*\*\*  $p < 0.01$  (two-tailed tests)
